# Supplementary material for: Two Figla homologues have disparate functions during sex differentiation in half-smooth tongue sole (Cynoglossus semilaevis)
Source: PubMed Central journal article supplement (PMC4911598; doi:10.1038/srep28219), 2016-06-17
Supplement: srep28219-s1.pdf [file srep28219-s1.pdf]

**Supplementary information**

**Two *Figla* homologues have disparate functions during sex differentiation in half-smooth tongue sole (*Cynoglossus semilaevis*)**

**Hailong Li<sup>1,2</sup>, Wenteng Xu<sup>1,2</sup>, Ning Zhang<sup>1,2</sup>, Changwei Shao<sup>1,2</sup>, Ying Zhu<sup>1,2</sup>,  
Zhongdian Dong<sup>1,2</sup>, Na Wang<sup>1,2</sup>, Xiaodong Jia<sup>1,2</sup>, Hao Xu<sup>1,2</sup> & Songlin Chen<sup>1,2\*</sup>**

<sup>1</sup>Key Lab of Sustainable Development of Marine Fisheries, Ministry of Agriculture;  
Yellow Sea Fisheries Research Institute, Chinese Academy of Fishery Sciences,  
Qingdao 266071, China

<sup>2</sup>Laboratory for Marine Fisheries Science and Food Production Processes, Qingdao  
National Laboratory for Marine Science and Technology, Qingdao 266273, China

\*Corresponding author:

E-mail: chensl@ysfri.ac.cn

## Supplementary Figures

**A**

```

1  ggcatcaggacagaagcaccgcaggtgtgcgtacctgtttcatcacagtacacatcaatg
61  agaaaggaaggaagaaacccgttgtttaatcagatTTTTTaaagtgacggtagaa
1  M V T M E V P V E E L M S
121 atattttgctattgtattataATGTTACAATGGAGGTTCGGTGGAGGAATTAATGAG
14  D V L K R V T C E S A L P M F S N I E K
181 CGACGTGTGAAGCGTGTGACGGCGAGTCTGCTGCCCCATGTTCACTAACATAGAGAA
34  F K R A K D G L Y F V A E D F N E T V K
241 GTTCAAACGAGCCAAAGACGGTTTGATTTCGTAGCCGAAAGACTTCAATGAAACGGTGAA
54  K R E L V N A K E R L R I R N L N T M F
301 AAAGAGGGAATTGGTTAACGCCAAGGAACGACTCAGGATTGCTAACCTGAACACAATGTT
74  S R L R R M V P L M R P D R K P S K V D
361 CTCCCGTCTGAGGCCAATGGTGCCTTATGAGACCTGACAGGAAGCCAGTAAAGTAGA
94  T L K A A T E Y I R L L A A V L Q D T D
421 CACACTAAAAGCTGCTACCGAATATATCCGATTGCTGCTGAGTTTTCGAAGATACTGA
114  D H D S S G S D F L N S A I T Y G Q T E
481 TGATCATGACAGCAGTGGTCTGATTTCCCTAAATAGTCAATCACTTATGGCCAGACTGA
134  G L G N D L W R L D D I L N T S D E C I
541 AGGCCTAGGGAATGACCTATGGAGATTGGATGATATACTAAACACATCAGATGAGTGCAT
54  D D G F M L S P G P V P E D G E M T R L
601 CGATGACGGATTATGTTATCCCTGGCCAGTCCAGAGGATGGAGAAATGACCAGGCT
174  M L Q H C V M P A Y Q V I I Q V A P D Q
661 GATGTTACAGCACTGTGTGCTGCTGATCAGGTCATCAATCAAGTGGCTCCTGATCA
194  T T V *
721 AACTACGGTCTGAtcctgtgaagacttgcatctcatagaagaatTTTctttgtctaat
781 ttctttataatTattgtttgagtttaattaatgtggaactgcttttattttcatttttaag
841 ccacatttacagaaggtctagacatttctaatggcctctaatTTTaaagtttattt
901 ttgatggTTTTatgttctcaacaaaagtcagcagcaattatcagatcacagtgccag
961 atggtatcaagatttatgtttgtaataaagtgtcactaataaattacctctccaatt
1021 tgcgaaaaaaaaaaaaaaaaaaaaaaaaa

```

**B**

```

1  tatgcttgacacagcactctgtcaacagccagcctcottaactataaaactttgaggtt
61  taccatcctatggagggtacaatgatggtctcctgggcaactgtcatgtctgcagctt
121 tccccatattgaaccgaactgggacaattgaaccagaccaagcaattaaataaacactg
181 gggaaaactgtcaggtgctttgagtttagtagatgattggtgtgacactcagtttaa
241 aacattcatgcctgatgatttcttcacagattctgattgttgaggtcctgttttgt
301 ggttttatgagctggaggccaaaattatgtaaaaaataacaaaataaataactgaaatt
361 gattgagttgtgcccataatctatgaatatacaggggtttggctttctgaatggaatt
421 gtggagttgaacagcttttgcgcatgttctgatttttggaaaggatctgtatgtcac
481 tttcctttcttctttgatgcatggagggtagtagcagcagcagtagcagaagcaacag
541 gtggagtagtgagcaagcagctagcctgctttttcttccaactgaactgctggatg
601 cacagttcacaaatgtctaatgattttgagccctgottgatagagcttcaattta
661 caaattctactgtctttcatgtgtcacaatgctacttattttctgttttctactc
721 atttttgaccacacaaacctctgctctcaactctctctcctcagcggattaccoccg
1  M F S R L R R M V
781 cccctctcgtttgtgattcgtaactgaaacacATGTTTCCTCCGTCGAGGCCAATGG
10  P L M R P D R K P S K V D T L K A A T E
841 TGCCCTTATGAGACCTGACAGGAAGCCAGTAAAGTAGACACACTAAAAGCTGCTACCG
30  Y I R L L A A V L Q D T D D H D S S G S
901 AATATATCCGATTGCTTGTGCGATTGCAAGATCTGATGATCATGACAGCAGTGGGT
50  D F L N S A I T Y G Q T E G L G N D L W
601 CTGATTTCCCTAAATAGTCAATCACTTATGCCCAGACTGAAGGCCATGGGAATGACCTAT
70  R L D D I L N T S D E C I D D G F M L S
1021 GGAGATTGGATGATATACTAAACACATCAGATGATGATGATGACGGATTTCATGTTAT
90  P G P V P E D G E M T R L M L Q H C V M
1081 CCCCCTGGCCAGTCCCAGAGGATGGAGAAATGACCAGGCTGATGTTACAGCACTGTGTA
110  P A Y Q V I I Q V A P D Q T T *
1141 TGCTGCGTATCAGGTCATCAATCAAGTGGCTCCTGATCAAACACTACGGTCTGAtcctgtg
1201 aagactgcatctcatagaagaatTTTctttgtctaatTTTctttataaattattgtttg
1261 agttaattaatgtggaactgcttttattttcatttttaagccacatttacagaaggtcta
1321 gacatttctaatggcctctaatTTTaaagttattttgatggtttttatgttctc
1381 aacaaaagtcagcagcaattatcagatcacagtgccagatggtatcaagatttatgtt
1441 tghtaataatgtagtcactaataaattacctctccaatttgcgaaaaaaaaaaaaaaaaa
1501 aaaaaaaaaa

```

**Figure S1 Full-length cDNA sequences and deduced amino acid sequences of *Figla\_tv1* (A) and *Figla\_tv2* (B) from *C. semilaevis*.** Lower case letters indicate the 5' and 3' UTR sequences. Upper case letters indicate the coding sequence. The predicted start codon (ATG) is boxed, and the predicted stop codon (TGA) is double underlined. The polyadenylation signal (aataaa) is underlined.



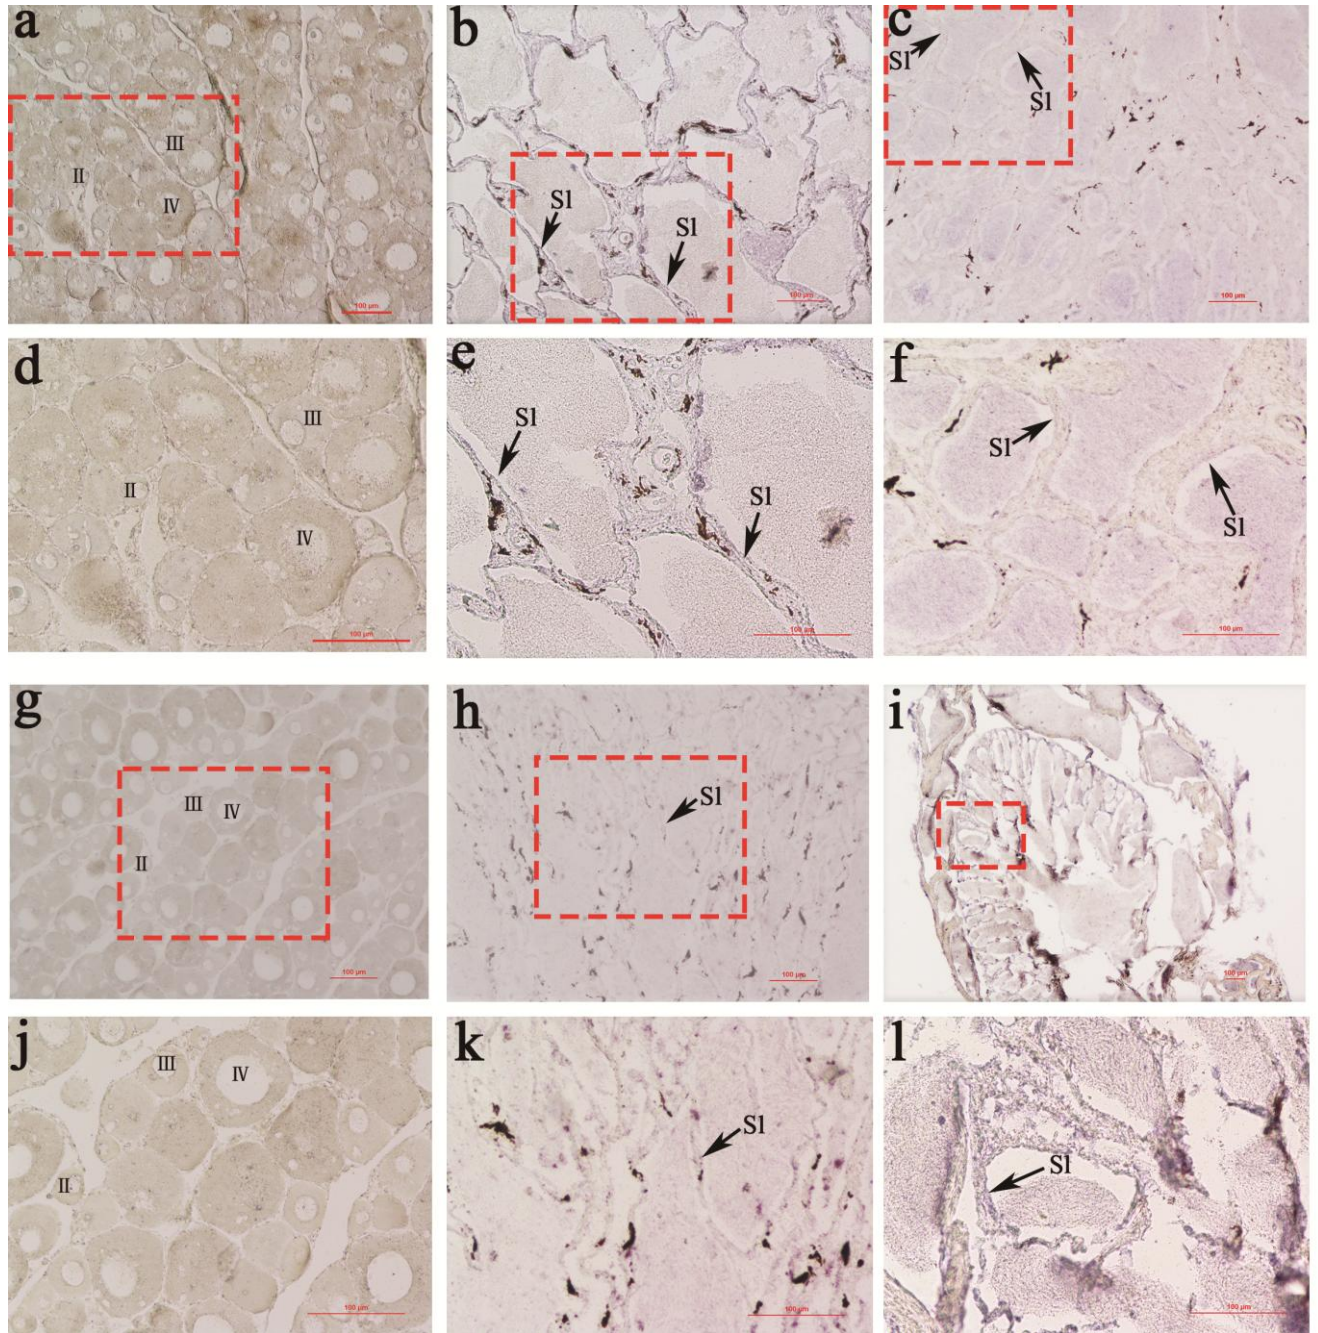

**Figure S3 Cyto-locations of *Figla\_tv1* and *Figla\_tv2* mRNAs in 1 yah gonads with sense RNA probes.** The figure shows the ovaries (left hand column), testes (middle column) and pseudomale testes (right hand column), labelled with *Figla\_tv1* sense (a-f) and *Figla\_tv2* sense (g-l) probes. a-c and g-i show the architecture with low magnification, while d-f and j-l indicate the red framed areas in (a-c, g-i) with large magnification. Oocytes at different developmental stages are marked by II, III and IV.

Sl: seminal lobule. Scale bars: 100  $\mu\text{m}$ .

## Supplementary Tables

**Table S1 Primers used in the PCR amplifications.**

| Group                      | Primers name                         | Sequence (5'-3')                                  |
|----------------------------|--------------------------------------|---------------------------------------------------|
| Sex identification primers | CseF382F                             | ATTCACTGACCCCTGAGAGC                              |
|                            | CseF382R                             | TGGCACCATCATTGTAAAATA                             |
| RACE primers               | Figla_tv1-5'R                        | CTGGTCATTTCTCCATCCTCTGGGACTGG                     |
|                            | Figla_tv1-5'N                        | GGGGCACCATTTCGCTCAGACGGGAGAAC                     |
|                            | Figla_tv1-3'R                        | TGTTCTCCCGTCTGAGGGCAATGGTGCC                      |
|                            | Figla_tv1-3'N                        | CCCAGTCCCAGAGGATGGAGAAATGACC                      |
|                            | Figla_tv2-5'R                        | AGTTACGAATCACAAAGCAGGAAGGGGC                      |
|                            | Figla_tv2-5'N                        | CGCTGAAGGAGAGAGGAGTGAAGACGAG                      |
|                            | Figla_tv2-3'R                        | TATGGCCAGACTGAAGGCCTAGGGAAT                       |
|                            | Figla_tv2-3'N                        | GGCTGATGTTACAGCACTGTGTGATGC                       |
|                            | UPM-long                             | CTAATACGACTCACTATAGGGCAAGCAG<br>TGGTATCAACGCAGAGT |
|                            | UPM-short                            | CTAATACGACTCACTATAGGG                             |
| qRT-PCR primers            | NUP                                  | AAGCAGTGGTATCAACGCAGAGT                           |
|                            | Figla_tv1-qRT-F                      | ACATAGAGAAGTTCAAACGAGCC                           |
|                            | Figla_tv1-qRT-R                      | CGGTAGCAGCTTTTAGTGTGTCT                           |
|                            | Figla_tv2-qRT-F                      | AACCTCTCGTCTTCACTCCTCTCTC                         |
|                            | Figla_tv2-qRT-R                      | TCCCTAGGCCTTCAGTCTGG                              |
|                            | StAR-F                               | AGGACGGCTGGACCACTGAAAT                            |
|                            | StAR-R                               | ACCTCGTGGGTGACCATCGTGT                            |
|                            | P450scc-F                            | GGATACGGGCGTGGTGAA                                |
|                            | P450scc-R                            | TGAATGGCCGGGTGCTTA                                |
|                            | $\beta$ -actin-F                     | GCTGTGCTGTCCCTGTA                                 |
|                            | $\beta$ -actin-R                     | GAGTAGCCACGCTCTGTC                                |
|                            | Rpl13 $\alpha$ -F                    | GTTTGCCCTCCTTGGTGC                                |
|                            | Rpl13 $\alpha$ -R                    | TGCCTGCTTTGTCAGCTTGA                              |
|                            | <i>in situ</i> hybridization primers | Figla_tv1-ISH-F                                   |
| Figla_tv1-ISH-R            |                                      | <u>GATGATATCTGTCTACTTTACTGGGCTTC</u>              |
| Figla_tv2-ISH-F            |                                      | <u>GAAGGATCCCATGCCCTGATGATTTCT</u>                |
| Figla_tv2-ISH-R            |                                      | <u>GATGATATCTCTGCCACTACTCCACCT</u>                |
